# Supplementary material
Source: publisher site journal article supplement (https://www.spandidos-publications.com/7706/downloadSupplementary)
Supplement: Supplementary file [file downloadSupplementary]

**Table SI.** The detailed search strategy for each database.

| Database       | Search query                                                                                                                                                                                                                                                                                                                                                                                                                                                                                                        | Search results |
|----------------|---------------------------------------------------------------------------------------------------------------------------------------------------------------------------------------------------------------------------------------------------------------------------------------------------------------------------------------------------------------------------------------------------------------------------------------------------------------------------------------------------------------------|----------------|
| PubMed         | ('Oropouche orthobunyavirus'[Title/Abstract] OR 'Oropouche fever'[Title/Abstract] OR 'Oropouche virus'[Title/Abstract] OR oropouche[Title/Abstract] OR OROV[Title/Abstract] OR 'Oropouche virus infection'[Title/Abstract] OR 'Oropouche fever virus'[Title/Abstract] OR 'Oropouche virus disease'[Title/Abstract] OR 'Orthobunyavirus Oropouche'[Title/Abstract] OR "Oropouche Orthobunyavirus infection"[Title/Abstract] OR 'Oropouche Virus (OROV)'[Title/Abstract] OR 'Oropouche virus (OROV)'[Title/Abstract]) | 361            |
| Embase         | 'oropouche orthobunyavirus'/exp OR 'oropouche orthobunyavirus' OR 'oropouche fever'/exp OR 'oropouche fever' OR 'oropouche virus'/exp OR 'oropouche virus' OR oropouche OR 'oropouche virus infection'/exp OR 'oropouche virus infection' OR 'oropouche fever virus' OR 'oropouche virus disease' OR 'orthobunyavirus oropouche' OR 'oropouche orthobunyavirus infection' OR 'oropouche virus (orov)' OR 'orov'                                                                                                     | 447            |
| Web of Science | TS=('Oropouche orthobunyavirus' OR 'Oropouche fever' OR 'Oropouche virus' OR oropouche OR OROV OR 'Oropouche virus infection' OR 'Oropouche fever virus' OR 'Oropouche virus disease' OR 'Orthobunyavirus Oropouche' OR 'Oropouche Orthobunyavirus infection' OR 'Oropouche Virus (OROV)' OR 'Oropouche virus (OROV)' OR 'OROV')                                                                                                                                                                                    | 363            |

**Table SII.** Quality appraisal of studies using the modified Newcastle-Ottawa Scale.

| <b>First author, year of publication</b> | <b>Representativeness</b> | <b>Sample size 500</b> | <b>Definition of test used</b> | <b>Ascertainment of event</b> | <b>Total</b> | <b>(Refs.)<sup>a</sup></b> |
|------------------------------------------|---------------------------|------------------------|--------------------------------|-------------------------------|--------------|----------------------------|
| Aguilar, 2011                            | 2                         | 0                      | 2                              | 1                             | 5            | (24)                       |
| Alvarez-Falconi, 2010                    | 2                         | 0                      | 2                              | 1                             | 5            | (25)                       |
| Alva-Urcia, 2017                         | 2                         | 0                      | 2                              | 1                             | 5            | (26)                       |
| Azevedo, 2007                            | 2                         | 0                      | 2                              | 1                             | 5            | (11)                       |
| Benitez, 2024                            | 2                         | 0                      | 2                              | 1                             | 5            | (34)                       |
| Cardoso, 2015                            | 2                         | 0                      | 2                              | 1                             | 5            | (16)                       |
| Carvalho, 2022                           | 2                         | 0                      | 2                              | 1                             | 5            | (17)                       |
| Castillo, 2018                           | 2                         | 0                      | 2                              | 1                             | 5            | (27)                       |
| Ciuderis, 2022                           | 2                         | 0                      | 2                              | 1                             | 5            | (36)                       |
| Cravo, 2021                              | 2                         | 0                      | 2                              | 1                             | 5            | (19)                       |
| da Costa, 2017                           | 2                         | 0                      | 2                              | 1                             | 5            | (20)                       |
| de Lima, 2025                            | 2                         | 0                      | 2                              | 1                             | 5            | (21)                       |
| de Melo Iani, 2025                       | 2                         | 0                      | 2                              | 1                             | 5            | (22)                       |
| Durango-Chavez, 2022                     | 2                         | 0                      | 2                              | 1                             | 5            | (28)                       |
| Gaillet, 2021                            | 2                         | 0                      | 2                              | 1                             | 5            | (32)                       |
| Gravier, 2025                            | 2                         | 0                      | 2                              | 1                             | 5            | (35)                       |
| Martins-Luna, 2020                       | 2                         | 0                      | 2                              | 1                             | 5            | (29)                       |
| Moreira, 2024                            | 2                         | 0                      | 2                              | 1                             | 5            | (2)                        |
| Morrison, 2024                           | 2                         | 0                      | 2                              | 1                             | 5            | (37)                       |
| Mourão, 2009                             | 2                         | 0                      | 2                              | 1                             | 5            | (23)                       |
| Naveca, 2024                             | 2                         | 1                      | 2                              | 1                             | 6            | (12)                       |
| Pinheiro, 1976                           | 1                         | 0                      | 2                              | 1                             | 4            | (13)                       |
| Silva-Caso, 2019                         | 2                         | 0                      | 2                              | 1                             | 5            | (30)                       |
| Vasconcelos, 1989                        | 1                         | 0                      | 2                              | 1                             | 4            | (14)                       |
| Vasconcelos, 2009                        | 1                         | 0                      | 2                              | 1                             | 4            | (15)                       |
| Watts, 2022                              | 2                         | 0                      | 2                              | 1                             | 5            | (31)                       |

<sup>a</sup>Reference citations can be found in the reference list in the main manuscript.

**Table SIII.** Methodological quality assessment of case series/reports using the tool described in the study by Murad *et al* (10)<sup>a</sup>.

| <b>First author, year of publication</b> | <b>Q1: Selection</b> | <b>Q2: Exposure ascertained</b> | <b>Q3: Outcome ascertained</b> | <b>Q4: Follow-up for outcomes</b> | <b>Q5: Sufficient reporting</b> | <b>(Refs.)<sup>a</sup></b> |
|------------------------------------------|----------------------|---------------------------------|--------------------------------|-----------------------------------|---------------------------------|----------------------------|
| Cola, 2025                               | Yes                  | Yes                             | Yes                            | Yes                               | Yes                             | (18)                       |
| Gourjault, 2025                          | Yes                  | Yes                             | Yes                            | Yes                               | Yes                             | (33)                       |

<sup>a</sup>Reference citations can be found in the reference list in the main manuscript.
